# Supplementary material for: EVI1 overexpression reprograms hematopoiesis via upregulation of Spi1 transcription
Source: PubMed Central journal article supplement (PMC6185954; doi:10.1038/s41467-018-06208-y), 2018-10-12
Supplement: 41467_2018_6208_MOESM1_ESM.pdf [file 41467_2018_6208_MOESM1_ESM.pdf]

## Supplementary Information

**EVI1 overexpression reprograms hematopoiesis  
via upregulation of *Spi1* transcription**

**Ayoub et al.**

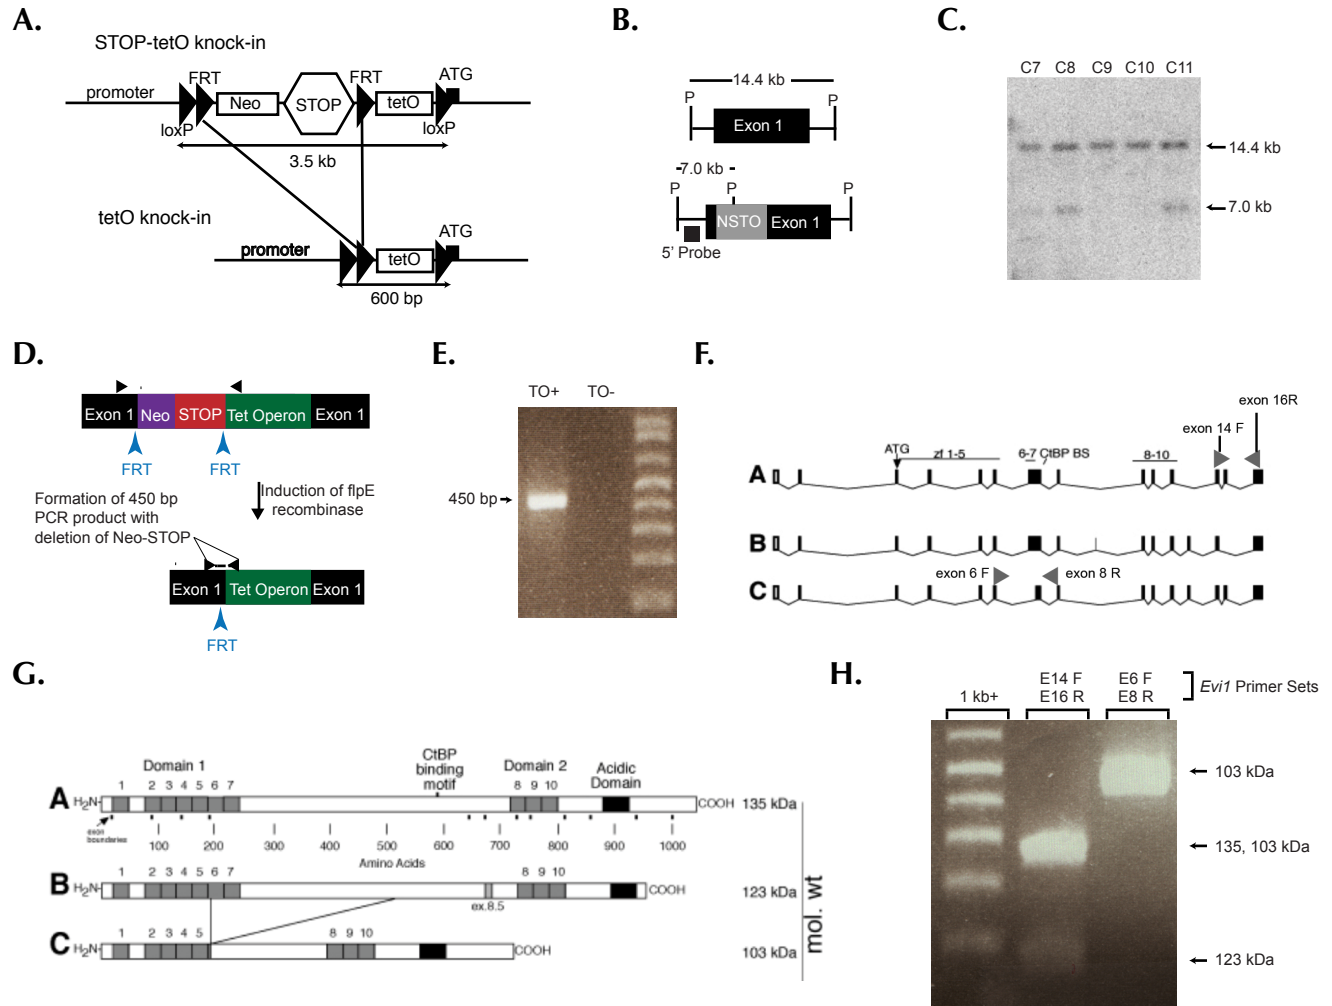

**Supplementary Figure 1** | **A.** Diagram of the knock-in cassette for the creation of the *Evi1TO* allele. **B.** Schematic showing the expected sizes with a PvuII digest, using a 5' hybridization probe. P denotes PvuII restriction enzyme sites. **C.** Southern blot of DNA from embryonic stem cell clones, digested with PvuII and hybridized with the 5' probe. Clones C7, C8, and C11 show the presence of the rearranged allele. **D.** Schematic depicting the removal of the Neo-Stop cassette using FlpE deleter strain, B6.129S4-*Gt(ROSA)26<sup>Sortm1(FLP1)</sup>Dym/RainJ*. **E.** PCR analysis of tail DNAs from the offspring from the cross with the FlpE deleter strain, using primers depicted in panel D, with a product size (450 bp) consistent with the loss of the Neo cassette. **F.** Diagram of the three major alternatively spliced *Evi1* transcripts, as well as location of the initiator methionine ATG, the locations of the encoded zinc fingers (zf 1-5, 6, 7, 8-10) and the CtBP interaction domain. Also shown is the location of the exon 6F and exon 8R primers for distinguishing splice form C from the other two; and primers 14F and 16R for distinguishing the B splice form from the other two. **G.** Diagram of the proteins encoded by the three alternatively spliced isoforms, with the zinc finger, CtBP binding, and acidic domains indicated. The apparent molecular weight of each isoform, in kilodaltons, is displayed to the right. **H.** PCR results from the analysis of cDNA prepared from RNA isolated from bone marrow of DOX-induced *Evi1<sup>TO</sup>*, *R26<sup>rtTA</sup>* mice, with primer pairs for detection of the B splice pattern (forward primer 14F, reverse primer 16R, yielding a band indicative of the presence of the B splicing pattern (denoted "123" to the right)) and the C splicing pattern (forward primer 6F, reverse primer 8R, yielding a band indicative of the C splicing pattern, denoted by "103" to the right).

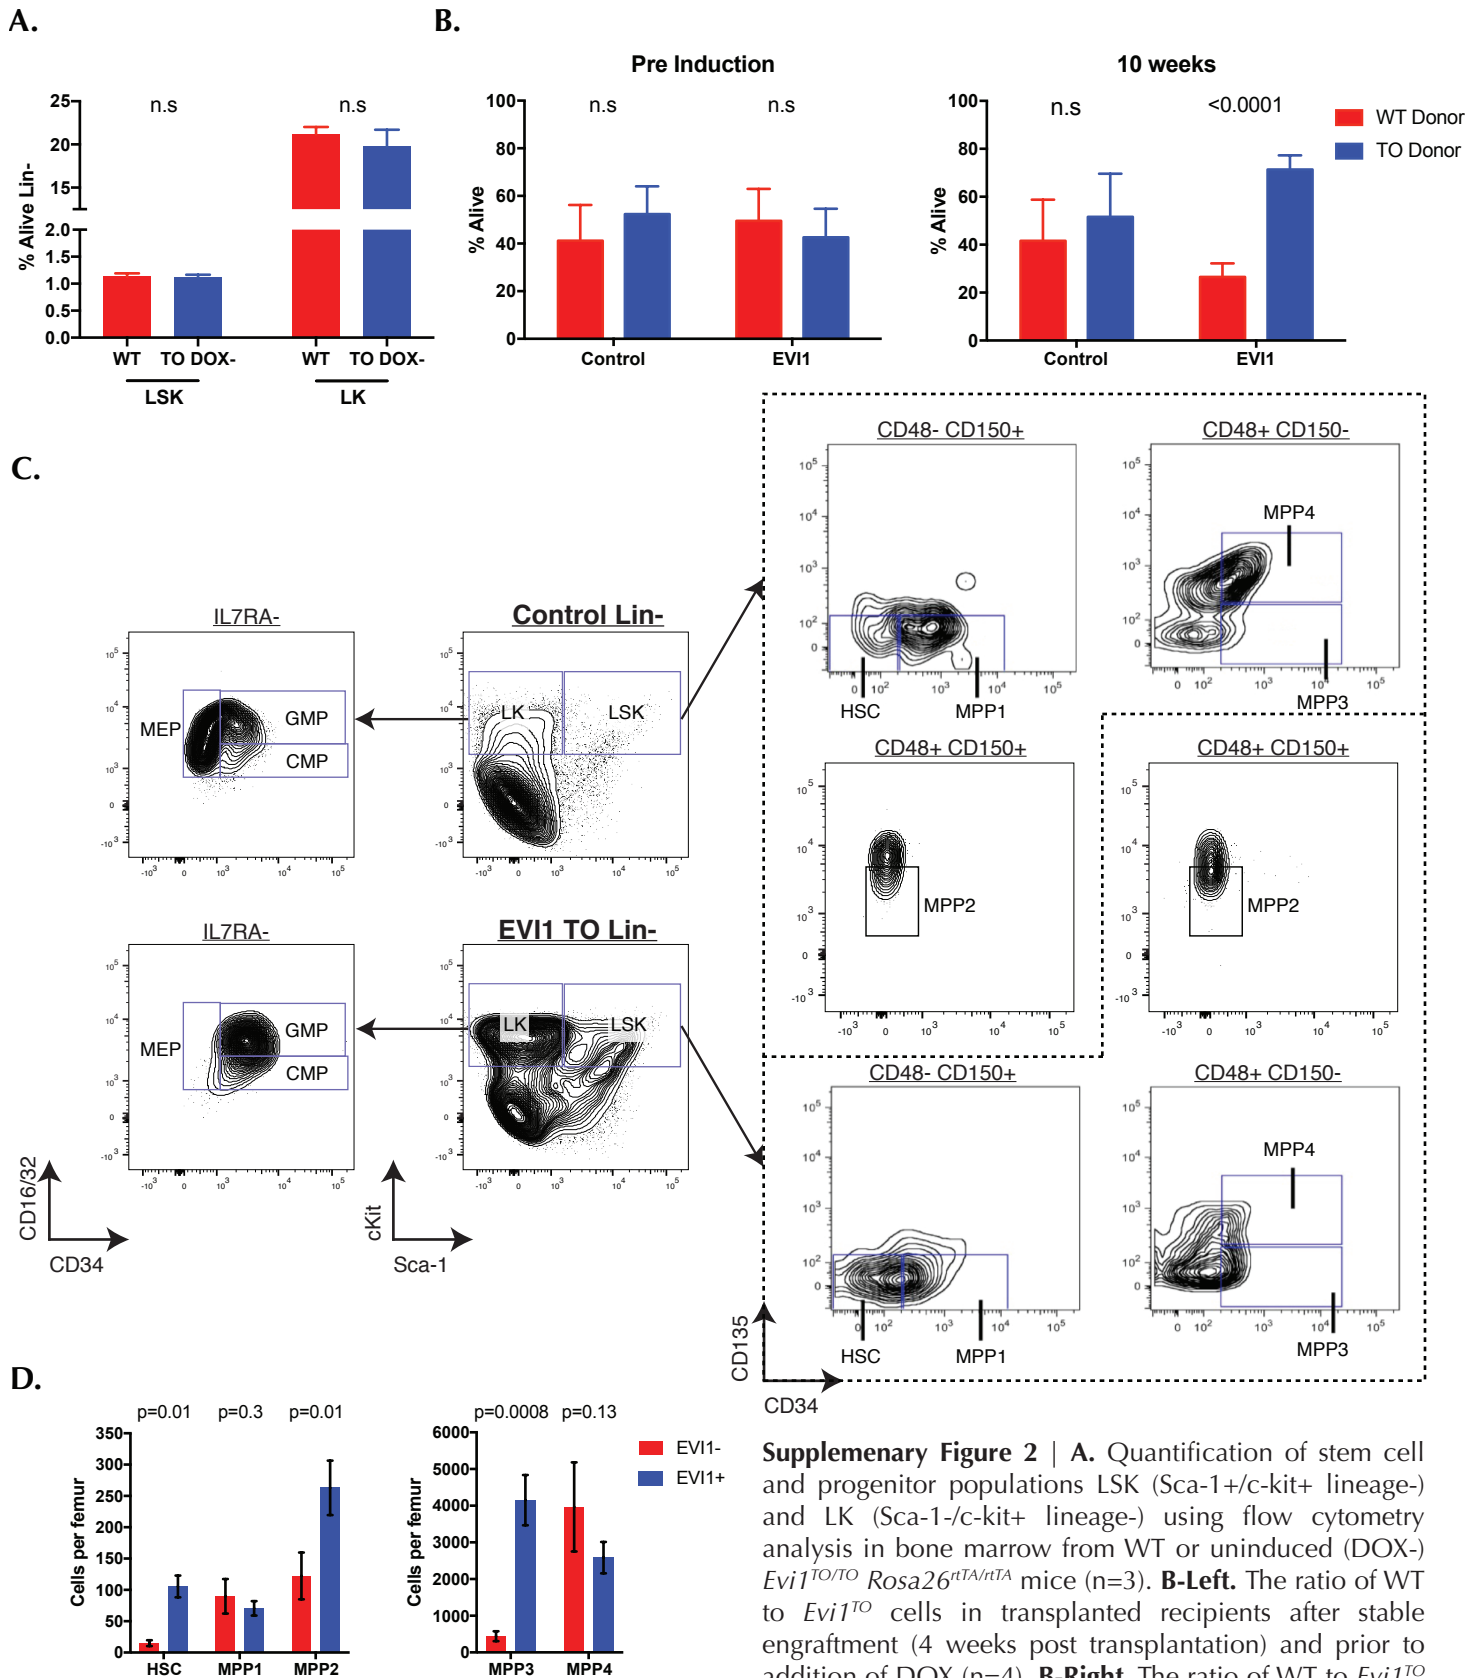

**Supplementary Figure 2 | A.** Quantification of stem cell and progenitor populations LSK (Sca-1+/c-kit+ lineage-) and LK (Sca-1-/c-kit+ lineage-) using flow cytometry analysis in bone marrow from WT or uninduced (DOX-) *Evi1<sup>TO/TO</sup> Rosa26<sup>rtTA/rtTA</sup>* mice (n=3). **B-Left.** The ratio of WT to *Evi1<sup>TO</sup>* cells in transplanted recipients after stable engraftment (4 weeks post transplantation) and prior to addition of DOX (n=4). **B-Right.** The ratio of WT to *Evi1<sup>TO</sup>*

cells in transplanted recipients 10 weeks after the addition of DOX (n=4). **C.** Representative FACS plots detailing the flow cytometry strategy that we adapted from Cabezas-Wallscheid et al.<sup>1</sup>. MPP populations within the LSK (Sca-1+/c-kit+ lineage-) compartment are quantified using cell surface markers (CD48, CD150, CD135, CD34). Progenitor populations (CMP, GMP, MEP) within the LK (Sca-1-/c-kit+ lineage-) compartment are quantified using cell surface markers (CD16/32, CD34) (n=3). **D.** Quantification of progenitor populations within LSK (Sca-1+/c-kit+ lineage-) in *Evi1<sup>TO/TO</sup> Rosa26<sup>rtTA/rtTA</sup>* mice at 3 days post-induction (n=3).

A.

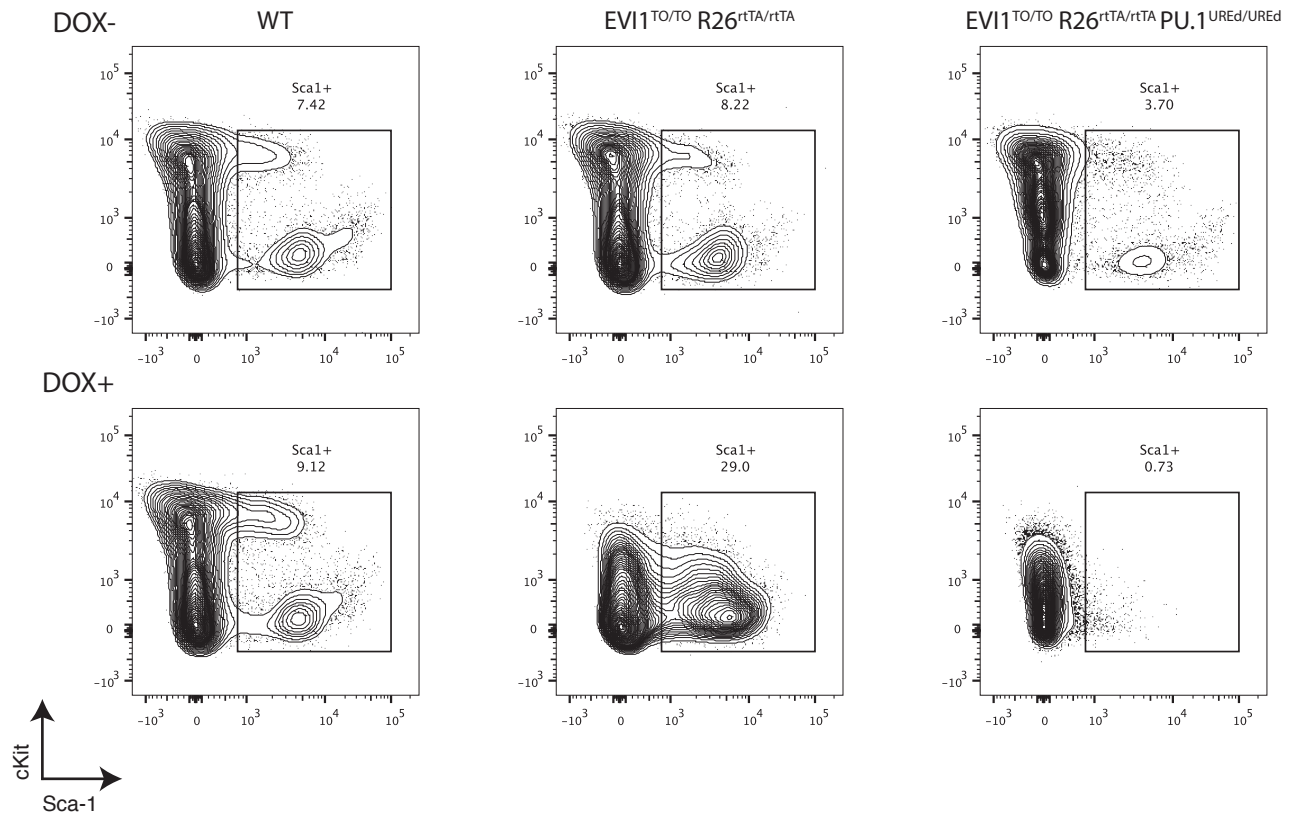

**Supplementary Figure 3 | A.** Representative cytometric analysis for Sca-1 and c-Kit, as indicated, of WBM from mice either without (top row) or with (bottom row) DOX treatment for 72 hrs. Three genotypes of mice were analyzed, as indicated on the top of each column. The percentage of Sca-1+ cells within Lin-/Alive cell population is indicated above the Sca-1 gate within each scatterplot (n=3).

**Supplementary Table 1**

| <u>Progenitor Compartment</u> | <u>Cell Surface Phenotype</u> |
|-------------------------------|-------------------------------|
| HSC                           | LSK CD34- CD135- CD48- CD150+ |
| MPP1                          | LSK CD34+ CD135- CD48- CD150+ |
| MPP2                          | LSK CD34+ CD135- CD48+ CD150+ |
| MPP3                          | LSK CD34+ CD135- CD48+ CD150- |
| MPP4                          | LSK CD34+ CD135+ CD48+ CD150- |

| <u>Progenitor Compartment</u> | <u>Cell Surface Phenotype</u>    |
|-------------------------------|----------------------------------|
| CMP                           | LK CD34+ CD16/32 <sup>low</sup>  |
| GMP                           | LK CD34+ CD16/32 <sup>high</sup> |

Hematopoietic progenitors were analyzed by flow cytometry using the surface marker phenotype described and detailed by Cabezas- Wallscheid et al.<sup>1</sup>. Red text is used to highlight the differences in expression of surface markers that are used to identify each progenitor population.

**Supplementary Table 2 | Cell surface markers phenotypes**

| Figure | Panel                                                                                                                                                                |
|--------|----------------------------------------------------------------------------------------------------------------------------------------------------------------------|
| 2A     | GFP, TER119=PerCP-Cy5.5, DAPI                                                                                                                                        |
| 2B,C,D | GFP, CD71-PE, CD41-PEcy7, Ter119-APC, DAPI                                                                                                                           |
| 2E     | GFP, TER119=PerCP-Cy5.5, Annexin-V=APC, 7AAD                                                                                                                         |
| 2F     | TER119=PerCP-Cy5.5, CD71=FITC, c-KIT=PE-Cy5, DAPI                                                                                                                    |
| 2G     | TER119=PerCP-Cy5.5, CD71=FITC, c-KIT=PE-Cy5, Anti-BrdU=APC, DAPI                                                                                                     |
| 3A     | GFP, B220=PE-Cy7, DAPI                                                                                                                                               |
| 3B     | GFP, CD3e-CFC594, CD11b-PEcy7, CD19-PerCPcy5.5, Gr1-APC-eF780, DAPI                                                                                                  |
| 3C     | GFP, CD3e=PE-CF594, B220=PE-Cy7, Annexin-V=APC, 7AAD                                                                                                                 |
| 3D     | CD3e=PE-Cy7, CD4=PE, CD8a=APC, DAPI                                                                                                                                  |
| 3E     | CD3e=PE-Cy7, CD4=PE, CD8a=APC, Annexin-V=FITC, DAPI                                                                                                                  |
| 3F     | CD3e=PE-Cy7, CD4=PE, CD8a=APC, Anti-BrdU=FITC, DAPI                                                                                                                  |
| 4A     | GFP, CD11b=V450, DAPI                                                                                                                                                |
| 4B     | GFP, LY6G/C=APC-Cy7, DAPI                                                                                                                                            |
| 4C     | GFP, cKit- PE-Cy5, Sca-1-PerCP-Cy5.5, CD16/32-APC-Cy7, CD34-AF700, CD127-BUV737, DAPI                                                                                |
| 4E     | GFP, CD11b-PECF594, Gr1-APC-eF780, F4/80-PE, DAPI                                                                                                                    |
| 4F     | GFP, LY6G/C=APC-Cy7, Annexin-V=APC, 7AAD                                                                                                                             |
| 5C     | CD45.2-APC, CD11b=V450, B220=PE-Cy7, TER119=PerCP-Cy5.5, DAPI                                                                                                        |
| 6B     | Sca-1-PerCP-Cy5.5, DAPI                                                                                                                                              |
| 6D     | CD45.1-PE, CD45.2-APC, cKit- PE-Cy5, Sca-1-PerCP-Cy5.5, CD34-AF700, CD16/32-FITC, CD127-BUV737, (lineage depletion with B220, CD3e, Ter119, CD11b, Gr1), DAPI        |
| 6E     | cKit- PE-Cy5, Sca-1-PerCP-Cy5.5, CD150-APC, CD48-APC-eFluor780, (lineage depletion with B220, CD3e, Ter119, CD11b, Gr1), DAPI                                        |
| 6F,G,H | GFP, Sca-1=PerCP-Cy5.5, DAPI                                                                                                                                         |
| 7E     | (CD3e=Biotin, B220=Biotin Ter119=Biotin, Gr1=Biotin) Lin=Biotin<br>PE-CF594 Streptavidin, c-KIT=PE-Cy5, Sca-1=PerCP-Cy5.5, DAPI                                      |
| S.2A   | GFP, (CD3e=Biotin, B220=Biotin Ter119=Biotin, Gr1=Biotin) Lin=Biotin<br>PE-CF594 Streptavidin, c-KIT=PE-Cy5, Sca-1=PerCP-Cy5.5, DAPI                                 |
| S.2B   | GFP, DAPI                                                                                                                                                            |
| S.2C   | CD16/32-APC-Cy7, CD34-AF700, cKit- PE-Cy5, Sca-1-PerCP-Cy5.5, CD135-PE, CD150-APC, CD48-APC-eFluor780, (lineage depletion with B220, CD3e, Ter119, CD11b, Gr1), DAPI |
| S.2D   | Refer to Supplementary Figure 2C, and Supplementary Table 1                                                                                                          |
| S.3A   | (CD3e=Biotin, B220=Biotin Ter119=Biotin, Gr1=Biotin) Lin=Biotin<br>PE-CF594 Streptavidin, Sca-1=PerCP-Cy5.5, DAPI                                                    |

**Supplementary Table 3 | Flow cytometry reagents**

| <b>Reagent</b>                | <b>Fluorescence</b> | <b>Source</b>  | <b>Catalog Number</b> |
|-------------------------------|---------------------|----------------|-----------------------|
| 7AAD                          |                     | BD Biosceinces | 559925                |
| Annexin V                     | FITC                | BD Biosceinces | 556547                |
| Annexin V                     | APC                 | eBioscience    | 88-8007-72            |
| Anti-Mouse Ig Particles       |                     | BD Biosceinces | 552843                |
| Anti-Rat/Hamster Ig Particles |                     | BD Biosceinces | 552845                |
| Biotin Mouse Lineage Panel    |                     | BD Biosceinces | 559971                |
| BrdU Flow Kit                 | APC                 | BD Biosceinces | 552598                |
| CD117 (c-Kit)                 | PE-Cy5              | eBioscience    | 15-1171-82            |
| CD11b                         | V450                | BD Biosceinces | 560455                |
| CD11b                         | PE-CF594            | BD Biosceinces | 562317                |
| CD11b                         | PE-Cy7              | eBioscience    | 25-0112-82            |
| CD127                         | BUV737              | BD Biosceinces | 564399                |
| CD135 (Flt3)                  | PE                  | eBioscience    | 12-1351-82            |
| CD150                         | APC                 | eBioscience    | 17-1501-81            |
| CD16/32                       | APC-Cy7             | BD Biosceinces | 560541                |
| CD19                          | PerCP-Cy5.5         | eBioscience    | 45-0193-82            |
| CD34                          | Alexa Fluor 700     | BD Biosceinces | 560518                |
| CD3e                          | PE-CF594            | BD Biosceinces | 562286                |
| CD41                          | PE-Cy7              | eBioscience    | 25-0411-82            |
| CD45.1                        | PE                  | BD Biosceinces | 553776                |
| CD45.2                        | APC                 | BD Biosceinces | 558702                |
| CD45R/B220                    | PE-Cy7              | BD Biosceinces | 552772                |
| CD48                          | APC-eFluor 780      | eBioscience    | 47-0481-82            |
| CD71                          | PE                  | eBioscience    | 11-0711-82            |
| CD71                          | FITC                | BD Biosceinces | 553266                |
| DAPI                          |                     | Invitrogen     | D3571                 |
| F4/80                         | PE                  | eBioscience    | 12-4801-80            |
| Gr1 (Ly-6G/C)                 | APC-eFluor 780      | eBioscience    | 47-5931-80            |
| Ly-6A/E (Sca-1)               | PerCP-Cy5.5         | eBioscience    | 45-5981-82            |
| Ly-6C                         | APC-Cy7             | BD Biosceinces | 560596                |
| Ly-6G                         | APC-Cy7             | BD Biosceinces | 560600                |
| Mouse B Lymphocyte Subset     |                     | BD Biosceinces | 558332                |
| Mouse T Lymphocyte Subset     |                     | BD Biosceinces | 558431                |
| PE-CF594 Streptavidin         |                     | BD Biosceinces | 562318                |
| TER-119                       | APC                 | eBioscience    | 17-5921-82            |
| TER-119                       | PerCP-Cy5.5         | BD Biosceinces | 560512                |

**Supplementary Table 4 | PCR primers**

|                    |                          |
|--------------------|--------------------------|
| Mds1 Exon 2 F      | TCCCTGATGACATCCCTATTCC   |
| Evi1 Exon2 Rev     | CATCTATGCAGAACTTCACATTGC |
| Evi1 Exon 1 F (70) | CTGAGTTGAGGCCGTAGAAATC   |
| Cebpe R            | CGCTCGTTTTTCAGCCATGTA    |
| Cebpe F            | AAGGCCAAGAGGGCGCATT      |
| Cebpg R            | GTATCTTGAGCTTTCTGCTTGCT  |
| Cebpg F            | GCGCAGAGAGCGGAACAA       |
| Gapdh RT F         | TGCACCACCACTGCTTAG       |
| Gapdh RT R         | GGATGCAGGGATGATGTTCC     |
| Gfi1b F            | CAGGGACAGTGTGGAGGTTC     |
| Gfi1b R            | CTAGAAAGGACCGTGGCATT     |
| Lmo2 F             | ATGTCCTCGGCCATCGAAAG     |
| Lmo2 R             | CGGTCCCCTATGTTCTGCTG     |
| Spi1 R             | TGACTACTACTCCTTCGTGG     |
| Spi1 F             | GATAAGGGAAGCACATCCGG     |
| rtTA (A)           | AAAGTCGCTCTGAGTTGTTAT    |
| rtTA (B)           | AAGACCGCGAAGAGTTTGTC     |
| rtTA (C)           | GGAGCGGGAGAAATGGATATG    |
| EVI1-TO F          | AAAGTCGCTCTGAGTTGTTAT    |
| EVI1-TO R          | AAGACCGCGAAGAGTTTGTC     |

Note: rtTA primers: A+B for rtTA allele, 320 bp; B+C for WT allele, 600 bp.



## Supplementary References

- 1 Cabezas-Wallscheid, N. *et al.* Identification of Regulatory Networks in HSCs and Their Immediate Progeny via Integrated Proteome, Transcriptome, and DNA Methylome Analysis. *Cell Stem Cell* **4**, 507-522 (2014).
